# Supplementary material for: Modeling and Assessing the Spatial and Vertical Distributions of Potentially Toxic Elements in Soil and How the Concentrations Differ
Source: MDPI journal article supplement (doi:10.3390/toxics9080181), 2021-07-31
Supplement: s1 [file s1]

## Article

# Modeling and Assessing the Spatial and Vertical Distributions of Potentially Toxic Elements in Soil and How the Concentrations Differ

Samuel Kudjo Ahado, Chukwudi Nwaogu, Vincent Yaw Oppong Sarkodie and Luboš Borůvka

**Table S1.** Contamination Factor (CF) and Pollution Loading Index (PLI) for PTEs in the organic soil horizon ( $N = 221$ ).

| Sample | CF_Cr | CF_Cu | CF_Pb | PLI  | Interpretation/Significance |
|--------|-------|-------|-------|------|-----------------------------|
| 1      | 0.13  | 0.47  | 2.13  | 0.51 | Non- polluted               |
| 2      | 0.09  | 0.16  | 1.41  | 0.27 | Non- polluted               |
| 3      | 0.11  | 0.35  | 2.37  | 0.45 | Non- polluted               |
| 4      | 0.11  | 0.17  | 1.97  | 0.34 | Non- polluted               |
| 5      | 0.11  | 0.28  | 3.85  | 0.49 | Non- polluted               |
| 6      | 0.12  | 0.25  | 2.69  | 0.43 | Non- polluted               |
| 7      | 0.10  | 0.22  | 2.10  | 0.35 | Non- polluted               |
| 8      | 0.10  | 0.31  | 3.26  | 0.47 | Non- polluted               |
| 9      | 0.10  | 0.20  | 2.48  | 0.37 | Non- polluted               |
| 10     | 0.08  | 0.19  | 2.06  | 0.31 | Non- polluted               |
| 11     | 0.06  | 0.07  | 0.68  | 0.14 | Non- polluted               |
| 12     | 0.21  | 0.52  | 3.01  | 0.69 | Non- polluted               |
| 13     | 0.20  | 0.53  | 5.37  | 0.83 | Non- polluted               |
| 14     | 0.18  | 0.47  | 3.63  | 0.68 | Non- polluted               |
| 15     | 0.20  | 0.62  | 3.26  | 0.74 | Non- polluted               |
| 16     | 0.19  | 0.48  | 2.61  | 0.62 | Non- polluted               |
| 17     | 0.23  | 0.43  | 2.86  | 0.65 | Non- polluted               |
| 18     | 0.21  | 0.56  | 1.97  | 0.61 | Non- polluted               |
| 19     | 0.16  | 0.57  | 2.24  | 0.59 | Non- polluted               |
| 20     | 0.15  | 0.48  | 3.44  | 0.63 | Non- polluted               |
| 21     | 0.19  | 0.54  | 4.07  | 0.76 | Non- polluted               |
| 22     | 0.21  | 0.55  | 6.67  | 0.91 | Non- polluted               |
| 23     | 0.18  | 0.58  | 5.96  | 0.85 | Non- polluted               |
| 24     | 0.20  | 0.55  | 5.48  | 0.84 | Non- polluted               |
| 25     | 0.09  | 0.17  | 2.36  | 0.33 | Non- polluted               |
| 26     | 0.16  | 0.58  | 4.52  | 0.74 | Non- polluted               |
| 27     | 0.23  | 0.77  | 4.78  | 0.94 | Non- polluted               |
| 28     | 0.20  | 0.85  | 3.89  | 0.87 | Non- polluted               |
| 29     | 0.12  | 0.37  | 4.93  | 0.60 | Non- polluted               |
| 30     | 0.15  | 0.45  | 6.07  | 0.74 | Non- polluted               |
| 31     | 0.16  | 0.59  | 3.89  | 0.72 | Non- polluted               |
| 32     | 0.13  | 0.39  | 2.55  | 0.51 | Non- polluted               |
| 33     | 0.19  | 0.83  | 7.04  | 1.03 | Deteriorating site quality  |
| 34     | 0.19  | 0.68  | 5.22  | 0.87 | Non- polluted               |
| 35     | 0.19  | 0.53  | 9.37  | 0.98 | Non- polluted               |
| 36     | 0.19  | 0.81  | 12.56 | 1.24 | Deteriorating site quality  |
| 37     | 0.16  | 0.51  | 5.81  | 0.77 | Non- polluted               |
| 38     | 0.10  | 0.48  | 3.30  | 0.54 | Non- polluted               |

|    |      |      |      |      |                                     |
|----|------|------|------|------|-------------------------------------|
| 39 | 0.14 | 0.61 | 5.22 | 0.76 | Non- polluted                       |
| 40 | 0.13 | 0.47 | 6.59 | 0.74 | Non- polluted                       |
| 41 | 0.15 | 0.59 | 4.44 | 0.73 | Non- polluted                       |
| 42 | 0.11 | 0.35 | 2.57 | 0.46 | Non- polluted                       |
| 43 | 0.19 | 0.60 | 4.56 | 0.81 | Non- polluted                       |
| 44 | 0.15 | 0.48 | 5.07 | 0.71 | Non- polluted                       |
| 45 | 0.12 | 0.32 | 2.69 | 0.47 | Non- polluted                       |
| 46 | 0.23 | 0.83 | 4.56 | 0.96 | Non- polluted                       |
| 47 | 0.19 | 0.70 | 5.81 | 0.91 | Non- polluted                       |
| 48 | 0.12 | 0.48 | 2.10 | 0.49 | Non- polluted                       |
| 49 | 0.23 | 0.81 | 4.81 | 0.97 | Non- polluted                       |
| 50 | 0.10 | 0.46 | 2.35 | 0.48 | Non- polluted                       |
| 51 | 0.05 | 0.28 | 1.43 | 0.27 | Non- polluted                       |
| 52 | 0.22 | 0.30 | 2.04 | 0.51 | Non- polluted                       |
| 53 | 0.17 | 0.62 | 4.30 | 0.77 | Non- polluted                       |
| 54 | 0.19 | 0.45 | 3.89 | 0.69 | Non- polluted                       |
| 55 | 0.12 | 0.44 | 2.98 | 0.54 | Non- polluted                       |
| 56 | 0.22 | 0.72 | 3.11 | 0.79 | Non- polluted                       |
| 57 | 0.08 | 0.41 | 1.93 | 0.40 | Non- polluted                       |
| 58 | 0.25 | 0.55 | 3.70 | 0.80 | Non- polluted                       |
| 59 | 0.14 | 0.34 | 2.68 | 0.50 | Non- polluted                       |
| 60 | 0.13 | 0.49 | 3.44 | 0.61 | Non- polluted                       |
| 61 | 0.11 | 0.54 | 3.54 | 0.59 | Non- polluted                       |
| 62 | 0.15 | 0.50 | 4.15 | 0.67 | Non- polluted                       |
| 63 | 0.15 | 0.43 | 4.15 | 0.64 | Non- polluted                       |
| 64 | 0.17 | 0.48 | 5.63 | 0.76 | Non- polluted                       |
| 65 | 0.16 | 1.35 | 4.96 | 1.02 | Deteriorating site quality          |
| 66 | 0.20 | 0.53 | 3.52 | 0.72 | Non- polluted                       |
| 67 | 0.18 | 0.63 | 3.27 | 0.72 | Non- polluted                       |
| 68 | 0.21 | 0.65 | 4.00 | 0.81 | Non- polluted                       |
| 69 | 0.25 | 0.65 | 4.11 | 0.87 | Non- polluted                       |
| 70 | 0.21 | 0.73 | 4.48 | 0.89 | Non- polluted                       |
| 71 | 0.19 | 0.52 | 3.56 | 0.71 | Non- polluted                       |
| 72 | 0.24 | 0.57 | 4.81 | 0.87 | Non- polluted                       |
| 73 | 0.24 | 0.61 | 4.19 | 0.85 | Non- polluted                       |
| 74 | 0.17 | 0.62 | 4.30 | 0.78 | Non- polluted                       |
| 75 | 0.15 | 0.17 | 1.79 | 0.35 | Non- polluted                       |
| 76 | 0.15 | 0.34 | 7.19 | 0.72 | Non- polluted                       |
| 77 | 0.19 | 0.53 | 4.26 | 0.75 | Non- polluted                       |
| 78 | 0.18 | 0.58 | 4.37 | 0.77 | Non- polluted                       |
| 79 | 0.14 | 0.49 | 4.00 | 0.65 | Non- polluted                       |
| 80 | 0.17 | 0.51 | 5.00 | 0.76 | Non- polluted                       |
| 81 | 0.21 | 0.80 | 5.81 | 1.00 | Baseline level of pollutant present |
| 82 | 0.19 | 0.76 | 5.37 | 0.92 | Non- polluted                       |
| 83 | 0.16 | 0.58 | 3.93 | 0.72 | Non- polluted                       |
| 84 | 0.18 | 0.56 | 5.85 | 0.84 | Non- polluted                       |
| 85 | 0.17 | 0.40 | 6.30 | 0.75 | Non- polluted                       |
| 86 | 0.14 | 0.61 | 6.78 | 0.83 | Non- polluted                       |
| 87 | 0.21 | 0.61 | 6.74 | 0.95 | Non- polluted                       |
| 88 | 0.18 | 0.47 | 6.96 | 0.84 | Non- polluted                       |
| 89 | 0.12 | 0.43 | 5.07 | 0.64 | Non- polluted                       |

|     |      |      |      |      |                            |
|-----|------|------|------|------|----------------------------|
| 90  | 0.23 | 0.76 | 5.00 | 0.95 | Non- polluted              |
| 91  | 0.21 | 0.54 | 4.07 | 0.77 | Non- polluted              |
| 92  | 0.11 | 0.38 | 2.64 | 0.48 | Non- polluted              |
| 93  | 0.23 | 0.52 | 6.93 | 0.93 | Non- polluted              |
| 94  | 0.11 | 0.68 | 2.19 | 0.55 | Non- polluted              |
| 95  | 0.12 | 0.34 | 2.09 | 0.45 | Non- polluted              |
| 96  | 0.09 | 0.27 | 2.30 | 0.39 | Non- polluted              |
| 97  | 0.19 | 0.38 | 4.33 | 0.68 | Non- polluted              |
| 98  | 0.12 | 0.46 | 4.26 | 0.61 | Non- polluted              |
| 99  | 0.18 | 0.35 | 3.00 | 0.58 | Non- polluted              |
| 100 | 0.13 | 0.43 | 3.23 | 0.56 | Non- polluted              |
| 101 | 0.17 | 0.53 | 4.22 | 0.72 | Non- polluted              |
| 102 | 0.24 | 0.48 | 4.26 | 0.79 | Non- polluted              |
| 103 | 0.29 | 0.88 | 5.04 | 1.09 | Deteriorating site quality |
| 104 | 0.22 | 0.45 | 5.15 | 0.79 | Non- polluted              |
| 105 | 0.10 | 0.23 | 3.85 | 0.45 | Non- polluted              |
| 106 | 0.12 | 0.23 | 4.37 | 0.50 | Non- polluted              |
| 107 | 0.15 | 0.34 | 3.50 | 0.56 | Non- polluted              |
| 108 | 0.12 | 0.22 | 2.84 | 0.42 | Non- polluted              |
| 109 | 0.71 | 0.34 | 3.07 | 0.90 | Non- polluted              |
| 110 | 0.14 | 0.36 | 3.10 | 0.54 | Non- polluted              |
| 111 | 0.63 | 0.29 | 2.43 | 0.76 | Non- polluted              |
| 112 | 1.18 | 0.15 | 1.04 | 0.57 | Non- polluted              |
| 113 | 1.43 | 0.31 | 2.86 | 1.08 | Deteriorating site quality |
| 114 | 1.19 | 0.31 | 2.34 | 0.95 | Non- polluted              |
| 115 | 0.08 | 0.26 | 1.68 | 0.33 | Non- polluted              |
| 116 | 0.09 | 0.31 | 1.51 | 0.34 | Non- polluted              |
| 117 | 0.08 | 0.28 | 1.75 | 0.34 | Non- polluted              |
| 118 | 0.08 | 0.06 | 0.46 | 0.13 | Non- polluted              |
| 119 | 0.17 | 0.24 | 1.29 | 0.37 | Non- polluted              |
| 120 | 0.09 | 0.16 | 1.31 | 0.27 | Non- polluted              |
| 121 | 0.11 | 0.43 | 4.48 | 0.61 | Non- polluted              |
| 122 | 0.13 | 0.53 | 3.68 | 0.64 | Non- polluted              |
| 123 | 0.09 | 0.16 | 1.41 | 0.27 | Non- polluted              |
| 124 | 0.12 | 0.19 | 1.44 | 0.32 | Non- polluted              |
| 125 | 0.10 | 0.31 | 3.26 | 0.47 | Non- polluted              |
| 126 | 0.07 | 0.26 | 2.16 | 0.35 | Non- polluted              |
| 127 | 0.08 | 0.20 | 1.53 | 0.29 | Non- polluted              |
| 128 | 0.12 | 0.17 | 2.63 | 0.39 | Non- polluted              |
| 129 | 0.29 | 0.33 | 2.26 | 0.60 | Non- polluted              |
| 130 | 0.15 | 0.33 | 3.10 | 0.53 | Non- polluted              |
| 131 | 0.15 | 0.45 | 5.19 | 0.71 | Non- polluted              |
| 132 | 0.43 | 0.21 | 1.33 | 0.49 | Non- polluted              |
| 133 | 0.18 | 0.41 | 3.17 | 0.61 | Non- polluted              |
| 134 | 0.19 | 0.59 | 3.74 | 0.74 | Non- polluted              |
| 135 | 0.11 | 0.24 | 2.70 | 0.42 | Non- polluted              |
| 136 | 0.18 | 0.39 | 3.70 | 0.64 | Non- polluted              |
| 137 | 0.16 | 0.36 | 1.88 | 0.47 | Non- polluted              |
| 138 | 0.18 | 0.48 | 2.49 | 0.59 | Non- polluted              |
| 139 | 0.17 | 0.58 | 3.44 | 0.70 | Non- polluted              |
| 140 | 0.18 | 0.55 | 3.27 | 0.69 | Non- polluted              |

|     |      |      |      |      |                                     |
|-----|------|------|------|------|-------------------------------------|
| 141 | 0.17 | 0.54 | 5.93 | 0.82 | Non- polluted                       |
| 142 | 0.12 | 0.17 | 3.54 | 0.41 | Non- polluted                       |
| 143 | 0.13 | 0.31 | 3.78 | 0.54 | Non- polluted                       |
| 144 | 0.16 | 0.43 | 7.30 | 0.80 | Non- polluted                       |
| 145 | 0.15 | 0.54 | 6.22 | 0.79 | Non- polluted                       |
| 146 | 0.20 | 0.68 | 5.93 | 0.93 | Non- polluted                       |
| 147 | 0.21 | 0.66 | 7.22 | 1.00 | Baseline level of pollutant present |
| 148 | 0.16 | 0.22 | 1.93 | 0.41 | Non- polluted                       |
| 149 | 0.22 | 0.79 | 5.70 | 0.99 | Non- polluted                       |
| 150 | 0.16 | 0.67 | 7.15 | 0.92 | Non- polluted                       |
| 151 | 0.12 | 0.40 | 3.28 | 0.54 | Non- polluted                       |
| 152 | 0.17 | 0.34 | 3.26 | 0.57 | Non- polluted                       |
| 153 | 0.11 | 0.25 | 2.57 | 0.42 | Non- polluted                       |
| 154 | 0.19 | 0.70 | 5.56 | 0.91 | Non- polluted                       |
| 155 | 0.15 | 0.34 | 3.57 | 0.57 | Non- polluted                       |
| 156 | 0.43 | 0.49 | 3.43 | 0.90 | Non- polluted                       |
| 157 | 0.26 | 0.88 | 9.26 | 1.29 | Deteriorating site quality          |
| 158 | 0.18 | 0.42 | 4.93 | 0.72 | Non- polluted                       |
| 159 | 0.12 | 0.15 | 4.04 | 0.42 | Non- polluted                       |
| 160 | 0.14 | 0.18 | 2.50 | 0.40 | Non- polluted                       |
| 161 | 0.17 | 0.43 | 6.15 | 0.77 | Non- polluted                       |
| 162 | 0.16 | 0.46 | 7.74 | 0.83 | Non- polluted                       |
| 163 | 0.16 | 0.29 | 3.78 | 0.56 | Non- polluted                       |
| 164 | 0.13 | 0.16 | 4.04 | 0.43 | Non- polluted                       |
| 165 | 0.10 | 0.15 | 3.51 | 0.38 | Non- polluted                       |
| 166 | 0.14 | 0.50 | 5.11 | 0.70 | Non- polluted                       |
| 167 | 0.16 | 0.32 | 5.19 | 0.64 | Non- polluted                       |
| 168 | 0.18 | 0.65 | 5.41 | 0.87 | Non- polluted                       |
| 169 | 0.06 | 0.29 | 1.24 | 0.27 | Non- polluted                       |
| 170 | 0.18 | 0.56 | 4.74 | 0.78 | Non- polluted                       |
| 171 | 0.14 | 0.21 | 2.39 | 0.41 | Non- polluted                       |
| 172 | 0.22 | 0.47 | 5.37 | 0.82 | Non- polluted                       |
| 173 | 0.40 | 0.56 | 3.85 | 0.96 | Non- polluted                       |
| 174 | 0.12 | 0.14 | 3.52 | 0.39 | Non- polluted                       |
| 175 | 0.14 | 0.21 | 2.77 | 0.43 | Non- polluted                       |
| 176 | 0.13 | 0.20 | 4.19 | 0.48 | Non- polluted                       |
| 177 | 0.14 | 0.32 | 3.63 | 0.55 | Non- polluted                       |
| 178 | 0.14 | 0.28 | 4.48 | 0.57 | Non- polluted                       |
| 179 | 0.13 | 0.33 | 2.30 | 0.46 | Non- polluted                       |
| 180 | 0.22 | 0.18 | 3.24 | 0.51 | Non- polluted                       |
| 181 | 0.22 | 0.33 | 4.04 | 0.66 | Non- polluted                       |
| 182 | 0.12 | 2.11 | 2.78 | 0.89 | Non- polluted                       |
| 183 | 0.17 | 0.12 | 2.59 | 0.37 | Non- polluted                       |
| 184 | 0.15 | 0.20 | 4.67 | 0.51 | Non- polluted                       |
| 185 | 0.17 | 0.21 | 2.97 | 0.47 | Non- polluted                       |
| 186 | 0.11 | 0.23 | 3.45 | 0.44 | Non- polluted                       |
| 187 | 0.14 | 0.26 | 4.37 | 0.55 | Non- polluted                       |
| 188 | 0.16 | 0.08 | 1.85 | 0.29 | Non- polluted                       |
| 189 | 0.15 | 0.14 | 3.41 | 0.42 | Non- polluted                       |
| 190 | 0.18 | 0.36 | 4.56 | 0.67 | Non- polluted                       |
| 191 | 0.14 | 0.18 | 2.91 | 0.42 | Non- polluted                       |

|     |      |      |       |      |                            |
|-----|------|------|-------|------|----------------------------|
| 192 | 0.98 | 0.23 | 2.17  | 0.78 | Non- polluted              |
| 193 | 0.25 | 0.40 | 10.78 | 1.02 | Deteriorating site quality |
| 194 | 0.16 | 0.56 | 4.15  | 0.72 | Non- polluted              |
| 195 | 0.31 | 0.44 | 2.01  | 0.65 | Non- polluted              |
| 196 | 0.45 | 0.13 | 1.75  | 0.47 | Non- polluted              |
| 197 | 1.30 | 0.27 | 1.99  | 0.89 | Non- polluted              |
| 198 | 0.07 | 0.17 | 1.19  | 0.24 | Non- polluted              |
| 199 | 0.06 | 0.06 | 0.26  | 0.10 | Non- polluted              |
| 200 | 0.09 | 0.25 | 3.19  | 0.42 | Non- polluted              |
| 201 | 0.09 | 0.32 | 2.69  | 0.43 | Non- polluted              |
| 202 | 0.09 | 0.26 | 1.26  | 0.31 | Non- polluted              |
| 203 | 0.08 | 0.09 | 1.14  | 0.20 | Non- polluted              |
| 204 | 0.07 | 0.18 | 1.95  | 0.29 | Non- polluted              |
| 205 | 0.10 | 0.40 | 3.01  | 0.49 | Non- polluted              |
| 206 | 0.11 | 0.48 | 3.32  | 0.55 | Non- polluted              |
| 207 | 0.08 | 0.19 | 2.39  | 0.33 | Non- polluted              |
| 208 | 0.07 | 0.21 | 1.61  | 0.29 | Non- polluted              |
| 209 | 0.07 | 0.19 | 1.69  | 0.28 | Non- polluted              |
| 210 | 0.15 | 0.43 | 2.86  | 0.57 | Non- polluted              |
| 211 | 0.13 | 0.30 | 3.47  | 0.52 | Non- polluted              |
| 212 | 0.11 | 0.35 | 2.37  | 0.45 | Non- polluted              |
| 213 | 0.11 | 0.17 | 1.97  | 0.34 | Non- polluted              |
| 214 | 0.12 | 0.25 | 2.69  | 0.43 | Non- polluted              |
| 215 | 0.10 | 0.20 | 2.48  | 0.37 | Non- polluted              |
| 216 | 0.08 | 0.13 | 1.63  | 0.25 | Non- polluted              |
| 217 | 0.08 | 0.19 | 2.06  | 0.31 | Non- polluted              |
| 218 | 0.06 | 0.07 | 0.68  | 0.14 | Non- polluted              |
| 219 | 0.06 | 0.19 | 1.23  | 0.24 | Non- polluted              |
| 220 | 0.09 | 0.40 | 2.64  | 0.45 | Non- polluted              |
| 221 | 0.13 | 0.17 | 1.04  | 0.29 | Non- polluted              |

**Table S2.** Contamination Factor (CF) and Pollution Loading Index (PLI) for PTEs in the mineral soil horizon ( $N = 221$ ).

| Sample | CF_Cr | CF_Cu | CF_Pb | PLI  | Interpretation/Significance |
|--------|-------|-------|-------|------|-----------------------------|
| 1      | 0.03  | 0.05  | 0.76  | 0.10 | Non-polluted                |
| 2      | 0.02  | 0.03  | 0.43  | 0.06 | Non-polluted                |
| 3      | 0.01  | 0.01  | 0.25  | 0.03 | Non-polluted                |
| 4      | 0.04  | 0.03  | 0.80  | 0.10 | Non-polluted                |
| 5      | 0.01  | 0.02  | 0.46  | 0.04 | Non-polluted                |
| 6      | 0.05  | 0.03  | 0.63  | 0.10 | Non-polluted                |
| 7      | 0.03  | 0.02  | 0.30  | 0.05 | Non-polluted                |
| 8      | 0.03  | 0.01  | 0.60  | 0.04 | Non-polluted                |
| 9      | 0.03  | 0.03  | 0.50  | 0.07 | Non-polluted                |
| 10     | 0.01  | 0.02  | 0.37  | 0.04 | Non-polluted                |
| 11     | 0.03  | 0.05  | 0.77  | 0.10 | Non-polluted                |
| 12     | 0.08  | 0.06  | 0.98  | 0.17 | Non-polluted                |
| 13     | 0.08  | 0.09  | 1.69  | 0.23 | Non-polluted                |
| 14     | 0.08  | 0.05  | 1.14  | 0.17 | Non-polluted                |
| 15     | 0.08  | 0.06  | 0.87  | 0.16 | Non-polluted                |
| 16     | 0.06  | 0.05  | 1.14  | 0.15 | Non-polluted                |
| 17     | 0.07  | 0.07  | 1.21  | 0.18 | Non-polluted                |
| 18     | 0.02  | 0.02  | 0.63  | 0.07 | Non-polluted                |

|    |      |      |      |      |              |
|----|------|------|------|------|--------------|
| 19 | 0.01 | 0.02 | 0.37 | 0.05 | Non-polluted |
| 20 | 0.04 | 0.04 | 0.93 | 0.11 | Non-polluted |
| 21 | 0.06 | 0.04 | 1.24 | 0.15 | Non-polluted |
| 22 | 0.11 | 0.08 | 2.77 | 0.29 | Non-polluted |
| 23 | 0.08 | 0.10 | 2.55 | 0.27 | Non-polluted |
| 24 | 0.10 | 0.07 | 2.74 | 0.27 | Non-polluted |
| 25 | 0.03 | 0.04 | 1.24 | 0.12 | Non-polluted |
| 26 | 0.04 | 0.05 | 3.53 | 0.19 | Non-polluted |
| 27 | 0.09 | 0.17 | 3.58 | 0.38 | Non-polluted |
| 28 | 0.04 | 0.15 | 3.65 | 0.28 | Non-polluted |
| 29 | 0.03 | 0.10 | 1.78 | 0.17 | Non-polluted |
| 30 | 0.05 | 0.10 | 1.08 | 0.17 | Non-polluted |
| 31 | 0.08 | 0.13 | 2.25 | 0.28 | Non-polluted |
| 32 | 0.03 | 0.09 | 2.61 | 0.19 | Non-polluted |
| 33 | 0.07 | 0.07 | 1.70 | 0.21 | Non-polluted |
| 34 | 0.07 | 0.13 | 1.98 | 0.25 | Non-polluted |
| 35 | 0.07 | 0.06 | 1.46 | 0.18 | Non-polluted |
| 36 | 0.03 | 0.06 | 1.78 | 0.15 | Non-polluted |
| 37 | 0.06 | 0.04 | 2.18 | 0.17 | Non-polluted |
| 38 | 0.08 | 0.14 | 2.27 | 0.29 | Non-polluted |
| 39 | 0.04 | 0.12 | 3.51 | 0.26 | Non-polluted |
| 40 | 0.06 | 0.04 | 2.74 | 0.19 | Non-polluted |
| 41 | 0.05 | 0.12 | 3.55 | 0.28 | Non-polluted |
| 42 | 0.02 | 0.09 | 1.98 | 0.16 | Non-polluted |
| 43 | 0.06 | 0.06 | 1.85 | 0.19 | Non-polluted |
| 44 | 0.05 | 0.04 | 2.25 | 0.16 | Non-polluted |
| 45 | 0.06 | 0.12 | 2.64 | 0.26 | Non-polluted |
| 46 | 0.06 | 0.06 | 3.00 | 0.23 | Non-polluted |
| 47 | 0.05 | 0.12 | 2.78 | 0.26 | Non-polluted |
| 48 | 0.06 | 0.04 | 1.13 | 0.14 | Non-polluted |
| 49 | 0.16 | 0.06 | 1.79 | 0.25 | Non-polluted |
| 50 | 0.03 | 0.18 | 2.36 | 0.24 | Non-polluted |
| 51 | 0.06 | 0.15 | 3.86 | 0.32 | Non-polluted |
| 52 | 0.12 | 0.14 | 2.28 | 0.34 | Non-polluted |
| 53 | 0.04 | 0.04 | 1.18 | 0.13 | Non-polluted |
| 54 | 0.10 | 0.13 | 1.58 | 0.27 | Non-polluted |
| 55 | 0.07 | 0.23 | 1.80 | 0.31 | Non-polluted |
| 56 | 0.07 | 0.18 | 2.27 | 0.31 | Non-polluted |
| 57 | 0.06 | 0.23 | 3.17 | 0.34 | Non-polluted |
| 58 | 0.14 | 0.24 | 4.34 | 0.53 | Non-polluted |
| 59 | 0.05 | 0.06 | 1.69 | 0.18 | Non-polluted |
| 60 | 0.03 | 0.17 | 1.32 | 0.18 | Non-polluted |
| 61 | 0.14 | 0.32 | 3.89 | 0.56 | Non-polluted |
| 62 | 0.04 | 0.08 | 2.21 | 0.19 | Non-polluted |
| 63 | 0.03 | 0.10 | 2.13 | 0.18 | Non-polluted |
| 64 | 0.07 | 0.10 | 2.67 | 0.27 | Non-polluted |
| 65 | 0.04 | 0.98 | 2.41 | 0.46 | Non-polluted |
| 66 | 0.06 | 0.08 | 1.48 | 0.19 | Non-polluted |
| 67 | 0.05 | 0.17 | 1.73 | 0.24 | Non-polluted |
| 68 | 0.04 | 0.09 | 2.10 | 0.21 | Non-polluted |
| 69 | 0.06 | 0.09 | 1.42 | 0.21 | Non-polluted |

|     |      |      |       |      |                            |
|-----|------|------|-------|------|----------------------------|
| 70  | 0.02 | 0.05 | 1.30  | 0.11 | Non-polluted               |
| 71  | 0.04 | 0.04 | 1.03  | 0.12 | Non-polluted               |
| 72  | 0.05 | 0.10 | 2.98  | 0.25 | Non-polluted               |
| 73  | 0.05 | 0.06 | 1.69  | 0.17 | Non-polluted               |
| 74  | 0.04 | 0.06 | 2.27  | 0.17 | Non-polluted               |
| 75  | 0.05 | 0.05 | 1.09  | 0.13 | Non-polluted               |
| 76  | 0.04 | 0.06 | 2.30  | 0.17 | Non-polluted               |
| 77  | 0.08 | 0.15 | 2.75  | 0.32 | Non-polluted               |
| 78  | 0.06 | 0.16 | 3.37  | 0.32 | Non-polluted               |
| 79  | 0.09 | 0.10 | 1.22  | 0.22 | Non-polluted               |
| 80  | 0.12 | 0.09 | 2.40  | 0.30 | Non-polluted               |
| 81  | 0.12 | 0.26 | 2.51  | 0.43 | Non-polluted               |
| 82  | 0.05 | 0.07 | 2.14  | 0.20 | Non-polluted               |
| 83  | 0.06 | 0.14 | 2.32  | 0.27 | Non-polluted               |
| 84  | 0.06 | 0.08 | 2.32  | 0.23 | Non-polluted               |
| 85  | 0.02 | 0.08 | 1.87  | 0.15 | Non-polluted               |
| 86  | 0.03 | 0.08 | 2.16  | 0.17 | Non-polluted               |
| 87  | 0.04 | 0.07 | 2.74  | 0.20 | Non-polluted               |
| 88  | 0.08 | 0.09 | 2.24  | 0.25 | Non-polluted               |
| 89  | 0.06 | 0.12 | 2.84  | 0.27 | Non-polluted               |
| 90  | 0.08 | 0.17 | 2.72  | 0.33 | Non-polluted               |
| 91  | 0.03 | 0.07 | 1.69  | 0.16 | Non-polluted               |
| 92  | 0.06 | 0.11 | 2.97  | 0.27 | Non-polluted               |
| 93  | 0.04 | 0.09 | 3.57  | 0.23 | Non-polluted               |
| 94  | 0.05 | 0.19 | 2.82  | 0.29 | Non-polluted               |
| 95  | 0.08 | 0.12 | 1.32  | 0.23 | Non-polluted               |
| 96  | 0.05 | 0.09 | 1.93  | 0.20 | Non-polluted               |
| 97  | 0.06 | 0.09 | 2.34  | 0.23 | Non-polluted               |
| 98  | 0.06 | 0.12 | 2.47  | 0.26 | Non-polluted               |
| 99  | 0.04 | 0.22 | 2.74  | 0.30 | Non-polluted               |
| 100 | 0.08 | 0.16 | 3.06  | 0.33 | Non-polluted               |
| 101 | 0.04 | 0.09 | 1.68  | 0.18 | Non-polluted               |
| 102 | 0.07 | 0.12 | 2.42  | 0.27 | Non-polluted               |
| 103 | 0.06 | 0.21 | 0.89  | 0.22 | Non-polluted               |
| 104 | 0.08 | 0.11 | 2.55  | 0.28 | Non-polluted               |
| 105 | 0.05 | 0.03 | 2.04  | 0.14 | Non-polluted               |
| 106 | 0.07 | 0.05 | 1.85  | 0.19 | Non-polluted               |
| 107 | 0.08 | 0.12 | 2.01  | 0.26 | Non-polluted               |
| 108 | 0.07 | 0.19 | 2.22  | 0.30 | Non-polluted               |
| 109 | 0.11 | 0.17 | 2.20  | 0.35 | Non-polluted               |
| 110 | 0.14 | 0.15 | 0.83  | 0.26 | Non-polluted               |
| 111 | 0.21 | 0.84 | 10.41 | 1.22 | Deteriorating site quality |
| 112 | 0.12 | 0.28 | 2.77  | 0.45 | Non-polluted               |
| 113 | 0.17 | 0.29 | 2.60  | 0.51 | Non-polluted               |
| 114 | 0.16 | 0.46 | 4.11  | 0.67 | Non-polluted               |
| 115 | 0.10 | 0.55 | 3.70  | 0.60 | Non-polluted               |
| 116 | 0.09 | 0.32 | 2.97  | 0.44 | Non-polluted               |
| 117 | 0.11 | 0.28 | 1.84  | 0.38 | Non-polluted               |
| 118 | 0.08 | 0.34 | 3.85  | 0.48 | Non-polluted               |
| 119 | 0.12 | 0.31 | 3.09  | 0.48 | Non-polluted               |
| 120 | 0.19 | 0.26 | 3.32  | 0.55 | Non-polluted               |

|     |      |      |      |      |                            |
|-----|------|------|------|------|----------------------------|
| 121 | 0.08 | 0.26 | 2.83 | 0.39 | Non-polluted               |
| 122 | 0.07 | 0.26 | 2.49 | 0.35 | Non-polluted               |
| 123 | 0.10 | 0.38 | 4.56 | 0.55 | Non-polluted               |
| 124 | 0.11 | 0.38 | 2.73 | 0.49 | Non-polluted               |
| 125 | 0.15 | 0.56 | 6.33 | 0.80 | Non-polluted               |
| 126 | 0.24 | 0.74 | 8.63 | 1.15 | Deteriorating site quality |
| 127 | 0.13 | 0.40 | 4.41 | 0.62 | Non-polluted               |
| 128 | 0.05 | 0.02 | 1.14 | 0.10 | Non-polluted               |
| 129 | 0.19 | 0.09 | 2.63 | 0.36 | Non-polluted               |
| 130 | 0.05 | 0.07 | 2.55 | 0.22 | Non-polluted               |
| 131 | 0.06 | 0.20 | 1.14 | 0.24 | Non-polluted               |
| 132 | 0.05 | 0.17 | 1.12 | 0.21 | Non-polluted               |
| 133 | 0.04 | 0.32 | 3.81 | 0.36 | Non-polluted               |
| 134 | 0.07 | 0.03 | 1.14 | 0.13 | Non-polluted               |
| 135 | 0.04 | 0.05 | 0.81 | 0.12 | Non-polluted               |
| 136 | 0.08 | 0.05 | 0.93 | 0.16 | Non-polluted               |
| 137 | 0.05 | 0.07 | 1.10 | 0.16 | Non-polluted               |
| 138 | 0.07 | 0.08 | 0.86 | 0.16 | Non-polluted               |
| 139 | 0.03 | 0.08 | 1.51 | 0.15 | Non-polluted               |
| 140 | 0.05 | 0.05 | 1.28 | 0.15 | Non-polluted               |
| 141 | 0.05 | 0.03 | 1.05 | 0.11 | Non-polluted               |
| 142 | 0.03 | 0.06 | 2.26 | 0.16 | Non-polluted               |
| 143 | 0.05 | 0.05 | 3.48 | 0.20 | Non-polluted               |
| 144 | 0.03 | 0.03 | 1.00 | 0.09 | Non-polluted               |
| 145 | 0.08 | 0.17 | 1.52 | 0.27 | Non-polluted               |
| 146 | 0.04 | 0.10 | 1.70 | 0.19 | Non-polluted               |
| 147 | 0.05 | 0.05 | 1.12 | 0.14 | Non-polluted               |
| 148 | 0.03 | 0.04 | 1.15 | 0.10 | Non-polluted               |
| 149 | 0.07 | 0.07 | 1.80 | 0.21 | Non-polluted               |
| 150 | 0.08 | 0.05 | 2.54 | 0.21 | Non-polluted               |
| 151 | 0.09 | 0.10 | 1.46 | 0.23 | Non-polluted               |
| 152 | 0.06 | 0.05 | 1.70 | 0.17 | Non-polluted               |
| 153 | 0.07 | 0.25 | 4.67 | 0.43 | Non-polluted               |
| 154 | 0.04 | 0.04 | 2.04 | 0.15 | Non-polluted               |
| 155 | 0.08 | 0.08 | 1.98 | 0.23 | Non-polluted               |
| 156 | 0.44 | 0.12 | 1.51 | 0.43 | Non-polluted               |
| 157 | 0.05 | 0.30 | 5.63 | 0.43 | Non-polluted               |
| 158 | 0.07 | 0.04 | 2.24 | 0.18 | Non-polluted               |
| 159 | 0.06 | 0.06 | 3.03 | 0.23 | Non-polluted               |
| 160 | 0.05 | 0.09 | 1.81 | 0.19 | Non-polluted               |
| 161 | 0.05 | 0.14 | 3.93 | 0.31 | Non-polluted               |
| 162 | 0.03 | 0.07 | 2.72 | 0.19 | Non-polluted               |
| 163 | 0.04 | 0.07 | 2.59 | 0.20 | Non-polluted               |
| 164 | 0.07 | 0.04 | 0.70 | 0.12 | Non-polluted               |
| 165 | 0.02 | 0.03 | 1.11 | 0.09 | Non-polluted               |
| 166 | 0.06 | 0.08 | 2.73 | 0.23 | Non-polluted               |
| 167 | 0.08 | 0.07 | 1.63 | 0.21 | Non-polluted               |
| 168 | 0.07 | 0.10 | 3.62 | 0.29 | Non-polluted               |
| 169 | 0.06 | 0.13 | 2.96 | 0.28 | Non-polluted               |
| 170 | 0.07 | 0.14 | 2.95 | 0.31 | Non-polluted               |
| 171 | 0.05 | 0.05 | 1.56 | 0.16 | Non-polluted               |



|     |      |      |      |      |                            |
|-----|------|------|------|------|----------------------------|
| 172 | 0.09 | 0.13 | 1.48 | 0.25 | Non-polluted               |
| 173 | 0.10 | 0.12 | 2.37 | 0.30 | Non-polluted               |
| 174 | 0.03 | 0.04 | 2.74 | 0.15 | Non-polluted               |
| 175 | 0.10 | 0.06 | 2.12 | 0.23 | Non-polluted               |
| 176 | 0.06 | 0.13 | 3.13 | 0.28 | Non-polluted               |
| 177 | 0.06 | 0.17 | 1.97 | 0.27 | Non-polluted               |
| 178 | 0.04 | 0.06 | 1.83 | 0.16 | Non-polluted               |
| 179 | 0.04 | 0.12 | 3.03 | 0.25 | Non-polluted               |
| 180 | 0.08 | 0.07 | 1.51 | 0.20 | Non-polluted               |
| 181 | 0.09 | 0.05 | 1.41 | 0.19 | Non-polluted               |
| 182 | 0.09 | 0.03 | 1.37 | 0.15 | Non-polluted               |
| 183 | 0.10 | 0.02 | 0.40 | 0.10 | Non-polluted               |
| 184 | 0.10 | 0.02 | 1.01 | 0.13 | Non-polluted               |
| 185 | 0.07 | 0.05 | 1.24 | 0.16 | Non-polluted               |
| 186 | 0.05 | 0.06 | 1.54 | 0.17 | Non-polluted               |
| 187 | 0.04 | 0.14 | 2.00 | 0.23 | Non-polluted               |
| 188 | 0.06 | 0.09 | 1.18 | 0.19 | Non-polluted               |
| 189 | 0.09 | 0.06 | 1.58 | 0.20 | Non-polluted               |
| 190 | 0.12 | 0.05 | 1.96 | 0.24 | Non-polluted               |
| 191 | 0.06 | 0.22 | 1.60 | 0.28 | Non-polluted               |
| 192 | 0.03 | 0.16 | 0.78 | 0.15 | Non-polluted               |
| 193 | 0.10 | 0.56 | 4.48 | 0.62 | Non-polluted               |
| 194 | 0.18 | 0.55 | 5.15 | 0.80 | Non-polluted               |
| 195 | 0.09 | 0.39 | 4.11 | 0.52 | Non-polluted               |
| 196 | 0.13 | 0.42 | 5.41 | 0.67 | Non-polluted               |
| 197 | 0.14 | 0.34 | 3.13 | 0.53 | Non-polluted               |
| 198 | 0.10 | 0.39 | 4.04 | 0.55 | Non-polluted               |
| 199 | 0.10 | 0.17 | 1.39 | 0.29 | Non-polluted               |
| 200 | 0.16 | 0.74 | 6.30 | 0.91 | Non-polluted               |
| 201 | 0.08 | 0.39 | 4.11 | 0.51 | Non-polluted               |
| 202 | 0.09 | 0.29 | 2.63 | 0.41 | Non-polluted               |
| 203 | 0.08 | 0.32 | 3.29 | 0.44 | Non-polluted               |
| 204 | 0.05 | 0.25 | 2.20 | 0.30 | Non-polluted               |
| 205 | 0.05 | 0.23 | 1.64 | 0.26 | Non-polluted               |
| 206 | 0.10 | 0.22 | 2.50 | 0.38 | Non-polluted               |
| 207 | 0.09 | 0.24 | 2.10 | 0.36 | Non-polluted               |
| 208 | 0.06 | 0.33 | 3.29 | 0.41 | Non-polluted               |
| 209 | 0.08 | 0.27 | 1.93 | 0.35 | Non-polluted               |
| 210 | 0.07 | 0.24 | 2.17 | 0.34 | Non-polluted               |
| 211 | 0.08 | 0.28 | 2.19 | 0.37 | Non-polluted               |
| 212 | 0.05 | 0.21 | 1.68 | 0.27 | Non-polluted               |
| 213 | 0.30 | 0.86 | 8.85 | 1.32 | Deteriorating site quality |
| 214 | 0.19 | 0.35 | 3.81 | 0.63 | Non-polluted               |
| 215 | 0.14 | 0.44 | 6.67 | 0.75 | Non-polluted               |
| 216 | 0.16 | 0.53 | 6.48 | 0.82 | Non-polluted               |
| 217 | 0.14 | 0.49 | 5.15 | 0.71 | Non-polluted               |
| 218 | 0.12 | 0.45 | 5.22 | 0.65 | Non-polluted               |
| 219 | 0.13 | 0.51 | 6.30 | 0.76 | Non-polluted               |
| 220 | 0.14 | 0.53 | 6.81 | 0.80 | Non-polluted               |
| 221 | 0.24 | 0.81 | 8.56 | 1.18 | Deteriorating site quality |
